# Supplementary material for: A theoretical study of the hydroboration of α,β-unsaturated carbonyl compounds catalyzed by a metal-free complex and subsequent C–C coupling with acetonitrile
Source: Royal Society of Chemistry journal article supplement (doi:10.1039/d1nj02218k), 2021-01-01
Supplement: d1nj02218k1.pdf [file d1nj02218k1.pdf]

*Electronic Supplementary Information*

*For*

**Theoretical Study on the Hydroboration of  $\alpha,\beta$ -Unsaturated  
Carbonyl Compounds Catalyzed by Metal-Free Complex and  
Subsequent C–C Coupling with Acetonitrile**

Ling Zhu,<sup>+,a,b</sup> Lin Zhang,<sup>+,a</sup> Zuoyin Yang,<sup>a</sup> Min Pu,<sup>\*a</sup> Ming Lei<sup>\*a</sup>

<sup>a</sup>State Key Laboratory of Chemical Resource Engineering, College of Chemistry, Beijing  
University of Chemical Technology, Institute of Computing Chemistry, Beijing 100029,  
China

<sup>b</sup>Hefei National Laboratory for Physical Sciences at the Microscale and Department of  
Chemistry, University of Science and Technology of China, Hefei 230026, China

<sup>+</sup> These authors contributed equally to this work

\*Email: [pumin@mail.buct.edu.cn](mailto:pumin@mail.buct.edu.cn) (Min Pu); [leim@mail.buct.edu.cn](mailto:leim@mail.buct.edu.cn) (Ming Lei)

## Content

|                                                                                                                                              |    |
|----------------------------------------------------------------------------------------------------------------------------------------------|----|
| 1. The scanning result of C–C bond formation via step-wise mechanism. ....                                                                   | 3  |
| 2. The direct 1,4-hydroboration and 1,2-hydroboration without DAP catalysis. ....                                                            | 3  |
| 3. The Gibbs free energy profiles of DAP catalyzed 1,4-hydroboration and 1,2-hydroboration of<br>1,1,1-Trifluoro-3-methyl-3-buten-2-one..... | 5  |
| 4. Hirshfeld charge and NBO charge.....                                                                                                      | 7  |
| 5. IRC of TSA1 and TSB1.....                                                                                                                 | 7  |
| 6. Functional and basis set test.....                                                                                                        | 8  |
| 7. Statistical table of free energy barriers for 1,4- and 1,2-reduction of different substrates. ....                                        | 9  |
| 9. Potential energy and free energy of stable points and transition states.....                                                              | 10 |
| 10. Atomic cartesian coordinates of intermediates and transition states in the most favored path<br>A (presented in Å). ....                 | 11 |

## 1. The scanning result of C-C bond formation via step-wise mechanism.

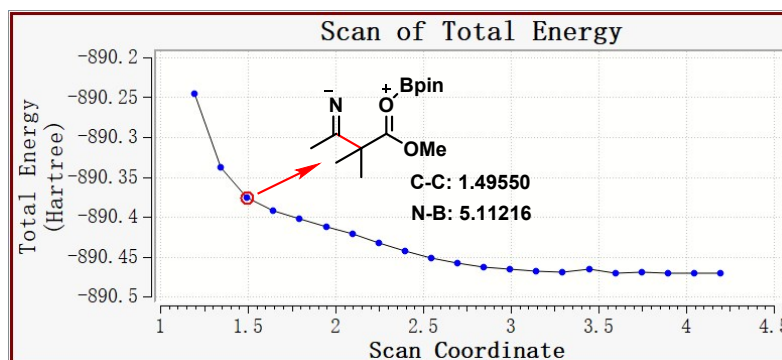

**Figure S1.** The scanning result of the direct formation of the C-C bond. The key bond lengths were given in Å.

## 2. The direct 1,4-hydroboration and 1,2-hydroboration without DAP catalysis.

In Figure S2, the theoretical study was performed on the direct 1,4-hydroboration and 1,2-hydroboration reactions of **1a** with HBpin without the participation of DAP and expressed by path C and path D, respectively.

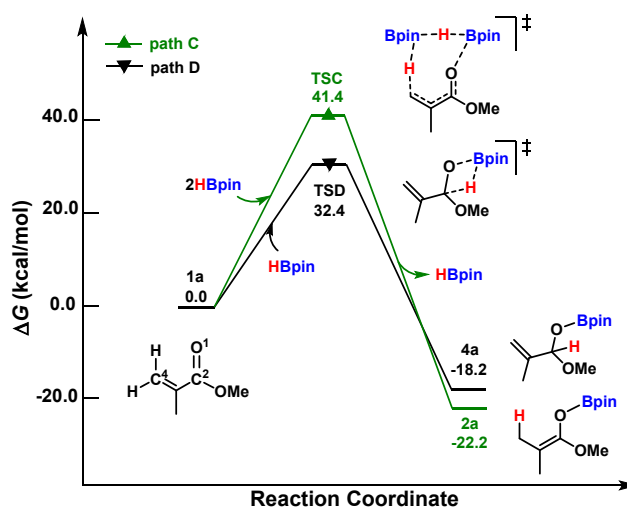

**Figure S2.** The Gibbs free energy profiles of catalyst-free pathways. Path C is 1,4-hydroboration mode and path D is 1,2-hydroboration mode.

The different of the chemoselectivity is mainly determined by the different properties of DAP and HBpin in the first hydrogen transfer step. In order to further

explore the effect of DAP on the reaction, IRC analysis was performed on **TSD** and **TSB1**, and the results are shown in Figure S3. In the IRC analysis of **TSD**, only Bpin is transferred to O atom at first, and then the C–H and O–B bonds are formed at the same time. This is completely different from the IRC analysis of **TSB1**, in which the C–H bond is formed at first and then the O–B bond is formed (a concerted but asynchronous process). This may be due to the weak nucleophilicity of the hydride in HBpin. Therefore, the empty orbital contained in the B atom coordinate with a pair of lone electrons of the O atom firstly, thus shortening the distance between the two molecules and making the reaction easier. However, for DAP the nucleophilicity of hydride is much stronger than that in HBpin, so hydride is easier to transfer first.

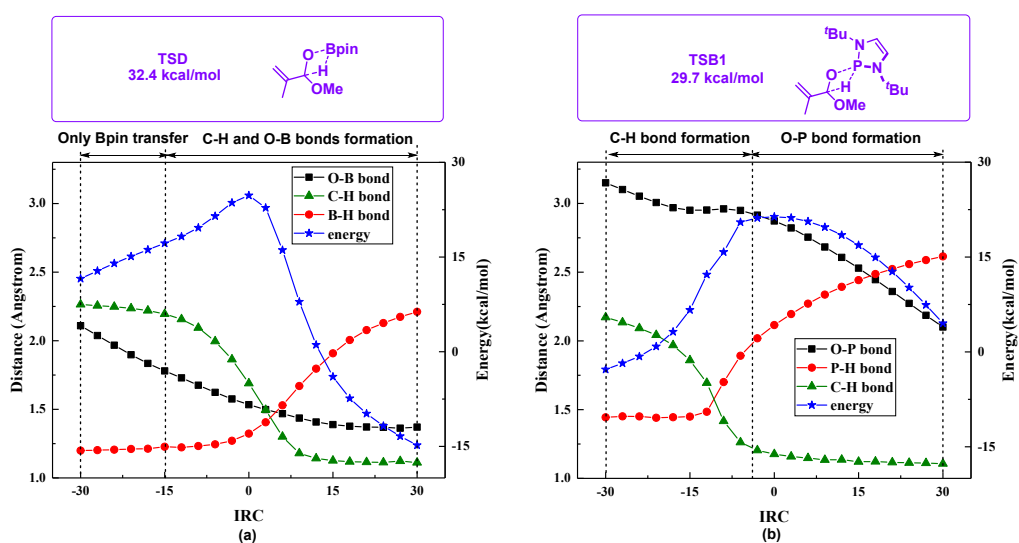

**Figure S3.** IRC analysis of (a) The transition state of path D and (b) The transition state of the first hydrogen transfer step in path B.

### 3. The Gibbs free energy profiles of DAP catalyzed 1,4-hydroboration and 1,2-hydroboration of 1,1,1-Trifluoro-3-methyl-3-buten-2-one.

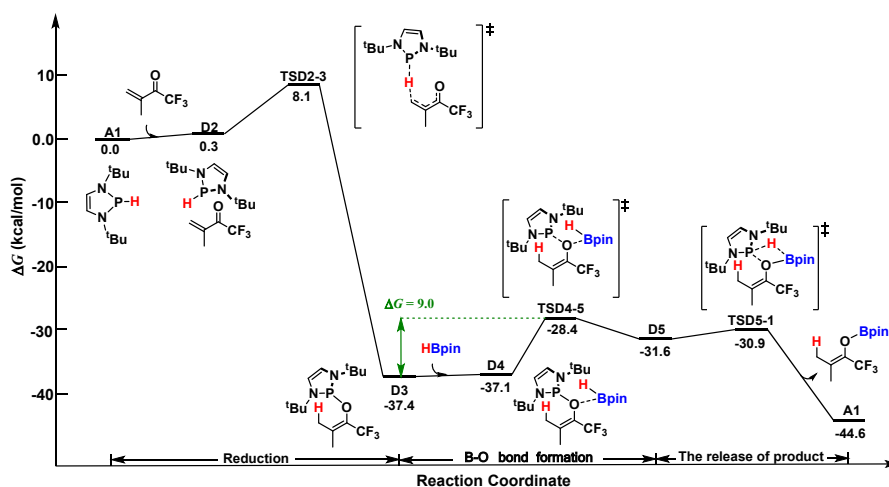

**Figure S4.** The Gibbs free energy profile of DAP catalyzed 1,4-hydroboration of 1,1,1-Trifluoro-3-methyl-3-buten-2-one.

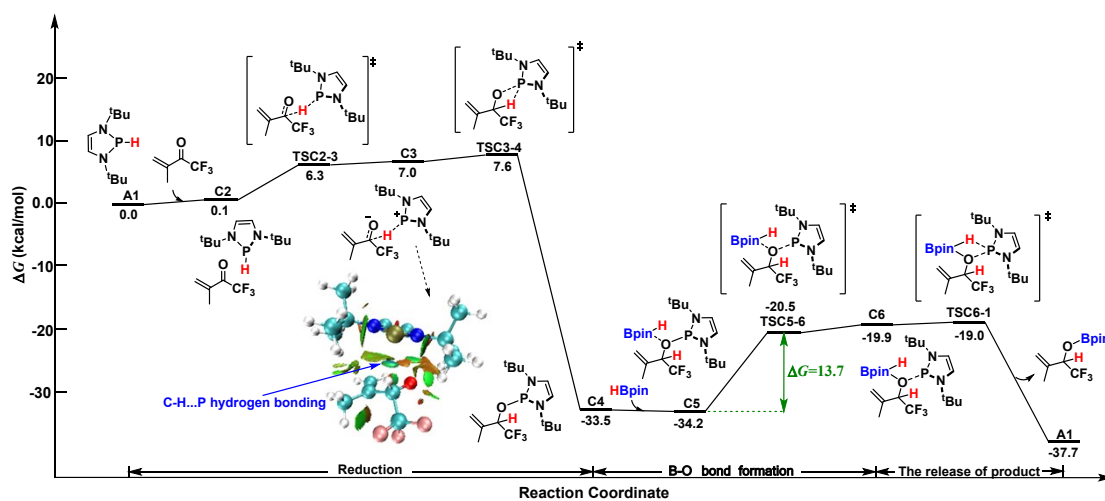

**Figure S5.** The Gibbs free energy profile of DAP catalyzed 1,2-hydroboration of 1,1,1-Trifluoro-3-methyl-3-buten-2-one. And the NCI analysis of **C3** using RDG method.

(Pink: F, blue: N, light blue: C, red: O, gray: H, brown: P)

Figure S4 and Figure S5 show the Gibbs free energy profiles of 1,4- and 1,2-hydroboration, where the -R in substrate is -CF<sub>3</sub>. Due to the inductive effect of the -CF<sub>3</sub> group, the energy barriers of the first hydrogen transfer steps of 1,2- and 1,4-

hydroboration are reduced, and the energy barrier of 1,2-hydroboration (6.3 kcal/mol) is lower than that of 1,4-hydroboration (8.1 kcal/mol). In the whole reaction pathway, the total energy barrier of 1,4-hydroboration is 9.0 kcal/mol lower than that of 1,2-hydroboration (13.7 kcal/mol), so that the 1,4-hydroboration pathway is still more favored. However, the first hydrogen transfer step is irreversible, so the chemoselectivity of hydroboration is determined by the first hydrogen transfer step.

In addition, the strongly electron-withdrawing substituents could make the first HT step change from a concerted mechanism to a stepwise mechanism. As shown in Figure S5, firstly, hydrogen is transferred to C<sup>2</sup> via **TSC2-3** to form intermediate **C3**. The electron withdrawing effect of -CF<sub>3</sub> group makes the H atom connected with C<sup>2</sup> more positive, thereby there is a strong C-H...P hydrogen bonding interaction, which helps to stabilize intermediate **C3**. Then the P-O bond is formed via **TSC3-4**. The tendency to reduce through a stepwise mechanism is another reason for the lower energy barrier of the first HT step in 1,2-hydroboration of substrates with electron-withdrawing substituents.

#### 4. Hirshfeld charge and NBO charge.

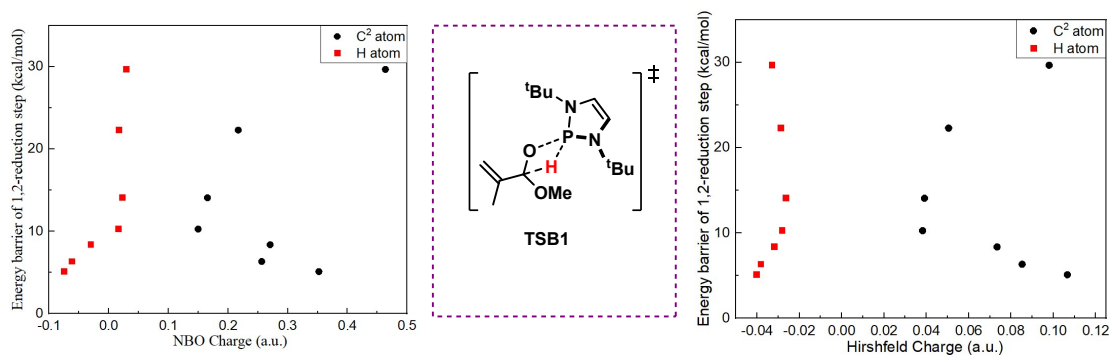

**Figure S6.** Correlation between the Hirshfeld charge and NBO charge with the energy barrier of the first hydrogen transfer of 1,2-hydroboration pathway for different substrates.

#### 5. IRC of TSA1 and TSB1.

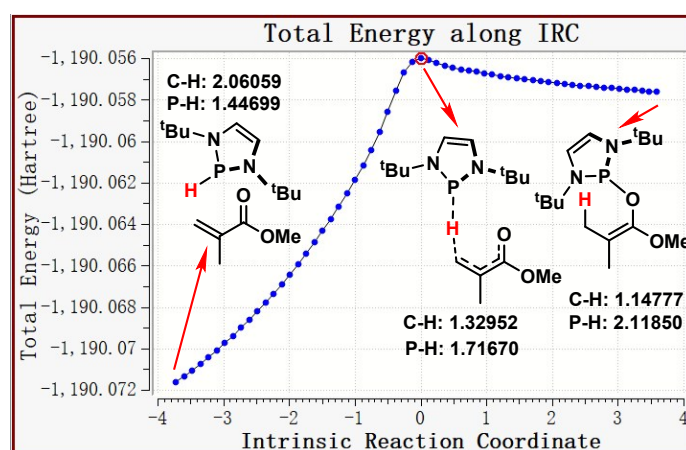

**Figure S7.** IRC of TSA1. The key bond lengths are given in Å.

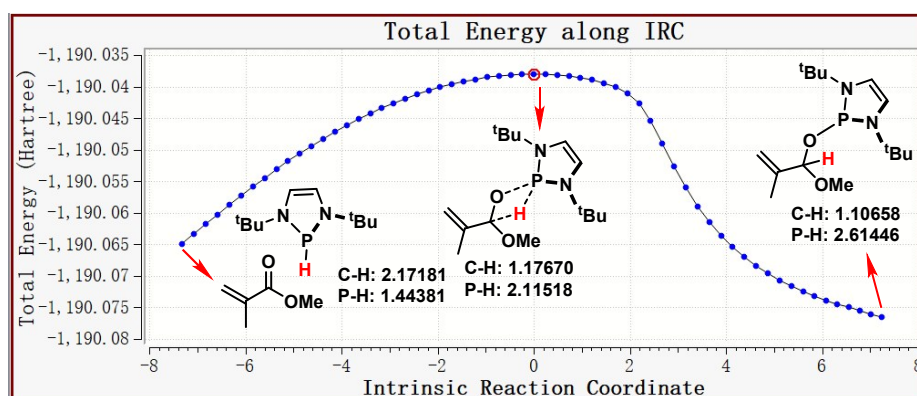

**Figure S8.** IRC of TSB1. The key bond lengths are given in Å.

## 6. Functional and basis set test.

**Table S1:** The relative Gibbs free energies (in kcal/mol) of key intermediates and transition states were calculated with different DFT functionals.

| Complex       | $\omega$ B97X-D | B3LYP | B3LYP-D3 | PBE0  |
|---------------|-----------------|-------|----------|-------|
| <b>A1</b>     | 0.0             | 0.0   | 0.0      | 0.0   |
| <b>TSA1</b>   | 15.0            | 11.7  | 6.6      | 10.4  |
| <b>TSA2</b>   | -4.6            | 9.5   | -8.6     | 5.5   |
| <b>2a</b>     | -22.2           | -18.8 | -21.9    | -22.7 |
| <b>TS2-3a</b> | -4.1            | 6.4   | -6.8     | -3.9  |
| <b>TSB1</b>   | 29.7            | 29.4  | 23.1     | 29.6  |
| <b>TSB2</b>   | 7.3             | 19.7  | -2.6     | 12.1  |

**Table S2:** The relative Gibbs free energies (in kcal/mol) of key intermediates and transition states were calculated with different basis sets under  $\omega$ B97X-D level.

| Complex       | 6-31G(d) | 6-31G(d,p) | 6-31+G(d) | 6-31++G(d,p) |
|---------------|----------|------------|-----------|--------------|
| <b>A1</b>     | 0.0      | 0.0        | 0.0       | 0.0          |
| <b>TSA1</b>   | 15.0     | 14.8       | 16.6      | 16.4         |
| <b>TSA2</b>   | -4.6     | -4.8       | 1.6       | 1.3          |
| <b>2a</b>     | -22.2    | -22.2      | -19.7     | -19.7        |
| <b>TS2-3a</b> | -4.1     | -4.4       | 0.6       | 0.4          |
| <b>TSB1</b>   | 29.7     | 27.5       | 28.3      | 27.6         |
| <b>TSB2</b>   | 7.3      | -0.6       | 5.8       | 5.0          |



**7. Statistical table of free energy barriers for 1,4- and 1,2-reduction of different substrates.**

**Table S3.** The energy barriers of the first hydrogen transfer steps in different pathways with different substrates.

| substrate                                                                           | NAO of C <sub>4</sub> atoms | $\Delta G_{1,4\text{-hydroboration}}$<br>(kcal/mol) | NAO of C <sub>2</sub> atoms | $\Delta G_{1,2\text{-hydroboration}}$<br>(kcal/mol) |
|-------------------------------------------------------------------------------------|-----------------------------|-----------------------------------------------------|-----------------------------|-----------------------------------------------------|
|    | -0.23405                    | 15.01505                                            | -0.06186                    | 29.67555                                            |
|    | -0.23137                    | 13.30006                                            | -0.09986                    | 22.31236                                            |
|    | -0.26003                    | 9.94916                                             | -0.14839                    | 14.07567                                            |
|    | -0.27303                    | 8.30132                                             | -0.19439                    | 10.28551                                            |
|    | -0.27518                    | 7.409                                               | -0.22196                    | 8.37976                                             |
|  | -0.28686                    | 8.06287                                             | -0.24295                    | 6.34098                                             |
|  | -0.29094                    | 6.38177                                             | -0.25600                    | 5.12362                                             |

**8. The sum of the valence NAO of hydride in HBpin and DAPs.**

**Table S4.** The sum of valence NAO of hydride.

| substance | the valence NAO of hydride |
|-----------|----------------------------|
| DAPs      | -0.13318                   |
| HBpin     | -0.00725                   |

## 9. Potential energy and free energy of stable points and transition states.

**Table S5.** The calculated absolute electronic energies ( $E$ , in a.u.), thermal free energies ( $G$ , in a.u.), and relative Gibbs energies ( $\Delta G$ , in kcal/mol) (Calculated at 298.15 K and 1 atm).

| Complex       | $E$          | $G$          | $\Delta G$ |
|---------------|--------------|--------------|------------|
| <b>A1</b>     | -844.3923739 | -844.118421  | 0.0        |
| HBpin         | -411.7566063 | -411.585482  | /          |
| <b>1a</b>     | -345.6797191 | -348.711421  | /          |
| <b>2a</b>     | -757.4853531 | -757.197208  | /          |
| <b>3a</b>     | -889.900908  | -890.2381312 | /          |
| <b>4a</b>     | -757.19094   | -757.479094  |            |
| <b>TSA1</b>   | -1190.056005 | -1189.670918 | 15.0       |
| <b>A2</b>     | -1190.113157 | -1189.720671 | -16.2      |
| <b>A3</b>     | -1601.881821 | -1601.306914 | -16.7      |
| <b>TSA2</b>   | -1601.867948 | -1601.2876   | -4.6       |
| <b>A4</b>     | -1601.873445 | -1601.293121 | -8.0       |
| <b>TSA3</b>   | -1601.86989  | -1601.291909 | -7.3       |
| <b>TS2-3a</b> | -890.1783087 | -889.845261  | -4.1       |
| <b>TSB1</b>   | -1190.103718 | -1189.647555 | 29.7       |
| <b>B1</b>     | -1601.875797 | -1189.709486 | -9.2       |
| <b>B2</b>     | -1601.849212 | -1601.298997 | -11.7      |
| <b>TSB2</b>   | -1601.850515 | -1601.268664 | 7.3        |
| <b>B3</b>     | -1601.848628 | -1601.270534 | 6.1        |
| <b>TSB3</b>   | -1190.084696 | -1601.26712  | 8.3        |
| <b>TS1-4a</b> | -757.3968562 | -757.110213  | 32.4       |
| <b>TS1-2a</b> | -1169.150284 | -1168.681427 | 41.4       |

**10. Atomic cartesian coordinates of intermediates and transition states in the most favored path A (presented in Å).**

**TSA1**

| -----                   |             |             |             |
|-------------------------|-------------|-------------|-------------|
| Coordinates (Angstroms) |             |             |             |
|                         | X           | Y           | Z           |
| -----                   |             |             |             |
| C                       | -2.77757900 | 0.69720200  | -0.88690200 |
| C                       | -1.95545200 | 1.75866300  | -0.94412400 |
| H                       | -3.67642100 | 0.54256500  | -1.46575300 |
| H                       | -2.06090700 | 2.62465900  | -1.58080500 |
| N                       | -2.38734600 | -0.22598100 | 0.08278200  |
| N                       | -0.91518600 | 1.67758700  | -0.01880600 |
| P                       | -0.86456500 | 0.16128500  | 0.73645800  |
| C                       | 0.10289200  | 2.74942100  | 0.12250400  |
| C                       | -3.07160500 | -1.52771900 | 0.25191200  |
| C                       | 1.03133600  | 2.40920800  | 1.29037000  |
| H                       | 1.59870100  | 1.49160000  | 1.09642700  |
| H                       | 1.76499900  | 3.21351900  | 1.40424900  |
| H                       | 0.48142100  | 2.31855600  | 2.23362000  |
| C                       | 0.92760000  | 2.84022400  | -1.16808200 |
| H                       | 1.62402800  | 3.68380500  | -1.10662400 |
| H                       | 1.51960200  | 1.93047000  | -1.30560000 |
| H                       | 0.28653100  | 2.99746600  | -2.04272800 |
| C                       | -0.61774100 | 4.07304400  | 0.40813600  |
| H                       | -1.25268800 | 3.98411400  | 1.29589600  |
| H                       | 0.11895700  | 4.86295000  | 0.58658400  |
| H                       | -1.24306900 | 4.39182500  | -0.43252100 |
| C                       | -2.39078300 | -2.31250900 | 1.37669700  |
| H                       | -2.90614000 | -3.26831500 | 1.51178300  |
| H                       | -1.34350600 | -2.53948000 | 1.14123700  |
| H                       | -2.42864200 | -1.77268700 | 2.32867300  |
| C                       | -4.53717900 | -1.27150800 | 0.62250300  |
| H                       | -5.05723400 | -2.22292900 | 0.77537600  |
| H                       | -4.60410300 | -0.68605700 | 1.54523400  |
| H                       | -5.06655100 | -0.72881900 | -0.16770800 |
| C                       | -2.97537300 | -2.32972500 | -1.05380700 |
| H                       | -3.46533600 | -1.81137200 | -1.88461200 |
| H                       | -1.92840900 | -2.49864400 | -1.32534000 |
| H                       | -3.46042500 | -3.30432900 | -0.93409000 |
| H                       | 0.11991700  | -0.69763900 | -0.37713600 |
| C                       | 3.14210200  | -0.83351800 | -0.29376300 |
| O                       | 4.18864400  | -1.44591900 | 0.33705800  |

|   |            |             |             |
|---|------------|-------------|-------------|
| O | 3.15650800 | 0.38748600  | -0.48149700 |
| C | 5.24548300 | -0.58850800 | 0.72955900  |
| H | 5.99310400 | -1.23114900 | 1.19993100  |
| H | 5.68782100 | -0.07586500 | -0.13055300 |
| H | 4.90420100 | 0.16587600  | 1.44627400  |
| C | 2.10642900 | -1.74375200 | -0.67256500 |
| C | 2.12762400 | -3.17641400 | -0.21392600 |
| H | 3.09511800 | -3.65470500 | -0.40389300 |
| H | 1.93656800 | -3.28573500 | 0.86566800  |
| H | 1.36090900 | -3.76027900 | -0.73788700 |
| C | 0.96556400 | -1.18620600 | -1.27924400 |
| H | 0.28199700 | -1.87632100 | -1.78147400 |
| H | 1.10462300 | -0.25355500 | -1.82902500 |

## A2

| -----                   |             |             |             |
|-------------------------|-------------|-------------|-------------|
| Coordinates (Angstroms) |             |             |             |
|                         | X           | Y           | Z           |
| -----                   |             |             |             |
| C                       | -0.46066700 | 1.80106300  | 1.19038200  |
| C                       | -1.65715200 | 1.20419700  | 1.26789600  |
| H                       | -0.02450000 | 2.47603400  | 1.91262600  |
| H                       | -2.37674100 | 1.29901800  | 2.06850700  |
| N                       | 0.22159700  | 1.46548700  | 0.00760500  |
| N                       | -1.93427200 | 0.40566900  | 0.14675200  |
| P                       | -0.54234600 | 0.18922800  | -0.80529100 |
| C                       | -3.16121800 | -0.41334300 | 0.06368700  |
| C                       | 1.41684100  | 2.21550400  | -0.43814700 |
| C                       | -3.18177100 | -1.16519100 | -1.27066700 |
| H                       | -2.35575500 | -1.88195600 | -1.34140200 |
| H                       | -4.11621200 | -1.72935000 | -1.35311200 |
| H                       | -3.12587200 | -0.47639400 | -2.12019900 |
| C                       | -3.18389900 | -1.42876500 | 1.21603900  |
| H                       | -4.05872900 | -2.08370800 | 1.13477300  |
| H                       | -2.27833000 | -2.04252300 | 1.19417500  |
| H                       | -3.23243600 | -0.92735500 | 2.18856700  |
| C                       | -4.38250100 | 0.51200600  | 0.13486600  |
| H                       | -4.35673500 | 1.24503400  | -0.67808600 |
| H                       | -5.30679300 | -0.07000900 | 0.05166900  |
| H                       | -4.42249500 | 1.05830100  | 1.08308700  |
| C                       | 1.89482400  | 1.67882600  | -1.79025500 |
| H                       | 2.79329500  | 2.22647100  | -2.09275800 |
| H                       | 2.15243100  | 0.61494900  | -1.74096200 |
| H                       | 1.13864600  | 1.81801000  | -2.57020900 |
| C                       | 1.04695300  | 3.69775200  | -0.58807800 |

|   |            |             |             |
|---|------------|-------------|-------------|
| H | 1.91207200 | 4.27270500  | -0.93584600 |
| H | 0.23560100 | 3.81719400  | -1.31392800 |
| H | 0.71841600 | 4.13092500  | 0.36243500  |
| C | 2.54081100 | 2.04476700  | 0.59267600  |
| H | 2.24455400 | 2.41497700  | 1.57999600  |
| H | 2.80628200 | 0.98749900  | 0.68447200  |
| H | 3.42941900 | 2.60487500  | 0.28106400  |
| H | 0.62882400 | -0.69245200 | 2.35251400  |
| C | 1.35876300 | -1.55600100 | 0.00586200  |
| O | 1.85814000 | -1.84949700 | -1.23495300 |
| O | 0.04468100 | -1.24584300 | 0.05097500  |
| C | 1.06357400 | -2.72548000 | -2.02020800 |
| H | 1.67521600 | -2.99885400 | -2.88293500 |
| H | 0.80109200 | -3.63159000 | -1.46024400 |
| H | 0.14717600 | -2.23957400 | -2.37257400 |
| C | 2.15079200 | -1.56139400 | 1.08707400  |
| C | 3.58278200 | -2.01356800 | 1.02620000  |
| H | 3.84396300 | -2.41188400 | 0.04350000  |
| H | 4.26981700 | -1.18479100 | 1.24981800  |
| H | 3.77764900 | -2.79104700 | 1.77781800  |
| C | 1.64489000 | -1.08730700 | 2.42040200  |
| H | 2.29294700 | -0.29568500 | 2.82224600  |
| H | 1.65041000 | -1.90101400 | 3.15930100  |

**A3**

| -----                   |             |             |             |
|-------------------------|-------------|-------------|-------------|
| Coordinates (Angstroms) |             |             |             |
|                         | X           | Y           | Z           |
| -----                   |             |             |             |
| C                       | 0.11925100  | -2.71716000 | 0.73524400  |
| C                       | 0.43659800  | -1.43314800 | 0.96132500  |
| C                       | -0.47160700 | -3.17758700 | -0.56672800 |
| H                       | -1.39302800 | -3.74824000 | -0.39033900 |
| H                       | -0.72317500 | -2.34374900 | -1.22410700 |
| H                       | 0.21592700  | -3.85449200 | -1.09411500 |
| C                       | 0.35684700  | -3.78000600 | 1.77211000  |
| H                       | -0.57564900 | -4.31395000 | 2.00112000  |
| H                       | 1.06675300  | -4.53511500 | 1.40575300  |
| H                       | 0.75526600  | -3.36477900 | 2.69987500  |
| O                       | 0.14944900  | -0.43634800 | 0.08186400  |
| O                       | 1.07808300  | -1.05870800 | 2.10301500  |
| C                       | 0.42176600  | -0.05683600 | 2.86056900  |
| H                       | -0.54229400 | -0.42543900 | 3.23781400  |
| H                       | 1.07679400  | 0.17040000  | 3.70438800  |
| H                       | 0.26271500  | 0.85205100  | 2.27392100  |

|   |             |             |             |
|---|-------------|-------------|-------------|
| C | 2.71585700  | 1.66344100  | 1.03631000  |
| C | 3.38074700  | 0.54194100  | 0.73605600  |
| H | 2.93535300  | 2.35008900  | 1.84151500  |
| H | 4.24058600  | 0.14102800  | 1.25326900  |
| N | 1.60754100  | 1.86523000  | 0.19524300  |
| N | 2.81279400  | -0.14936800 | -0.34354400 |
| P | 1.31691400  | 0.52054200  | -0.80867300 |
| C | 3.53718200  | -1.24553900 | -1.02348400 |
| C | 0.99473700  | 3.20509200  | 0.04926500  |
| C | 3.80098600  | -2.38203700 | -0.02636300 |
| H | 2.85763000  | -2.75193400 | 0.38587700  |
| H | 4.31688100  | -3.20964300 | -0.52601300 |
| H | 4.43222200  | -2.05470300 | 0.80625000  |
| C | 2.68642400  | -1.78133900 | -2.17692600 |
| H | 3.20878000  | -2.61573800 | -2.65604800 |
| H | 1.72015100  | -2.15362500 | -1.82101000 |
| H | 2.50569600  | -1.01671500 | -2.93953400 |
| C | 4.86117900  | -0.70276800 | -1.57897300 |
| H | 5.50764000  | -0.32489900 | -0.77950500 |
| H | 5.40819400  | -1.49247600 | -2.10595300 |
| H | 4.67312600  | 0.11769300  | -2.27980400 |
| C | 0.41574500  | 3.65315100  | 1.39919900  |
| H | -0.00597000 | 4.66056000  | 1.31180300  |
| H | -0.38437500 | 2.97643400  | 1.71704700  |
| H | 1.17700400  | 3.68049900  | 2.18594900  |
| C | 2.06535300  | 4.19847700  | -0.42453200 |
| H | 1.62867300  | 5.19192700  | -0.57516600 |
| H | 2.87582600  | 4.29422200  | 0.30588600  |
| H | 2.50082600  | 3.86308800  | -1.37174600 |
| C | -0.14130300 | 3.15614800  | -0.97411800 |
| H | 0.21939600  | 2.90422100  | -1.97629100 |
| H | -0.91473700 | 2.43551400  | -0.69133500 |
| H | -0.61629800 | 4.14122700  | -1.02987800 |
| B | -2.51811800 | 0.35304900  | -1.83124700 |
| O | -2.88360100 | -0.91134200 | -1.48487900 |
| O | -3.10184000 | 1.32714800  | -1.07108400 |
| C | -3.74708300 | 0.66967400  | 0.04660700  |
| C | -3.66077600 | -1.87841300 | 0.58247200  |
| H | -4.38407700 | -1.78885100 | 1.40075500  |
| H | -3.78117200 | -2.86949500 | 0.13414100  |
| H | -2.64981100 | -1.81026900 | 0.99206200  |
| C | -5.24253500 | -1.06346100 | -1.17679600 |
| H | -5.20557200 | -2.04341100 | -1.66210700 |
| H | -6.07826400 | -1.06145000 | -0.47006500 |

|   |             |             |             |
|---|-------------|-------------|-------------|
| H | -5.43630400 | -0.31342500 | -1.95048600 |
| C | -5.05335700 | 1.39081800  | 0.34691600  |
| H | -5.59555400 | 0.88679500  | 1.15462800  |
| H | -4.84062800 | 2.41454000  | 0.67059400  |
| H | -5.70329000 | 1.44420600  | -0.52954600 |
| C | -2.79236700 | 0.79668100  | 1.23307200  |
| H | -2.61844300 | 1.85933100  | 1.43250300  |
| H | -3.21180600 | 0.34532700  | 2.13804900  |
| H | -1.83048100 | 0.32907000  | 1.00803700  |
| C | -3.91018100 | -0.80890400 | -0.47159700 |
| H | -1.77749000 | 0.59440900  | -2.73285400 |

## TSA2

| -----                   |             |             |             |
|-------------------------|-------------|-------------|-------------|
| Coordinates (Angstroms) |             |             |             |
|                         | X           | Y           | Z           |
| -----                   |             |             |             |
| C                       | -0.38878900 | -2.04141500 | 1.30020800  |
| C                       | -0.04616300 | -0.75773300 | 1.12159600  |
| C                       | -0.91034700 | -2.91442300 | 0.19427900  |
| H                       | -1.84147300 | -3.40272900 | 0.51327500  |
| H                       | -1.12798000 | -2.34717600 | -0.71216300 |
| H                       | -0.20606700 | -3.72536500 | -0.03999000 |
| C                       | -0.30995500 | -2.67972600 | 2.66046600  |
| H                       | -1.31192100 | -2.87053600 | 3.07006500  |
| H                       | 0.19137400  | -3.65476900 | 2.59577300  |
| H                       | 0.24080100  | -2.06054400 | 3.37183800  |
| O                       | -0.08123700 | -0.11488000 | -0.07739800 |
| O                       | 0.42789400  | 0.00829700  | 2.15077400  |
| C                       | -0.57430900 | 0.74067000  | 2.84183200  |
| H                       | -1.20810200 | 0.06690600  | 3.43401600  |
| H                       | -0.05259400 | 1.41980400  | 3.52096900  |
| H                       | -1.20110000 | 1.31206700  | 2.15065800  |
| C                       | 3.08298800  | 1.09598700  | 0.92582900  |
| C                       | 3.33444500  | -0.20790500 | 0.75869800  |
| H                       | 3.44950300  | 1.72793000  | 1.71953100  |
| H                       | 3.96404500  | -0.83468300 | 1.37211200  |
| N                       | 2.22185600  | 1.59468600  | -0.05885900 |
| N                       | 2.63748900  | -0.74036200 | -0.33407800 |
| P                       | 1.54927400  | 0.36246400  | -0.99855700 |
| C                       | 2.99011200  | -2.06369900 | -0.90654200 |
| C                       | 1.83609300  | 3.02691200  | -0.13728300 |
| C                       | 2.88395500  | -3.13352800 | 0.18715700  |
| H                       | 1.90213400  | -3.09205100 | 0.66490300  |
| H                       | 3.02884900  | -4.12814100 | -0.24745800 |

|   |             |             |             |
|---|-------------|-------------|-------------|
| H | 3.64577500  | -3.00181300 | 0.96274600  |
| C | 2.02772300  | -2.39896100 | -2.04835700 |
| H | 2.25483600  | -3.39917300 | -2.43008000 |
| H | 0.98626500  | -2.39486700 | -1.71341600 |
| H | 2.12730800  | -1.69577200 | -2.88165800 |
| C | 4.42289600  | -1.99730200 | -1.45107000 |
| H | 5.13947600  | -1.74836200 | -0.66121800 |
| H | 4.71343000  | -2.96329700 | -1.87824300 |
| H | 4.50009400  | -1.23485700 | -2.23349400 |
| C | 0.67321500  | 3.30168800  | 0.82207400  |
| H | 0.41032100  | 4.36562300  | 0.80495200  |
| H | -0.21235200 | 2.72463200  | 0.54086900  |
| H | 0.94935900  | 3.03427100  | 1.84726300  |
| C | 3.04530700  | 3.89633000  | 0.23340700  |
| H | 2.80666600  | 4.94656400  | 0.03824500  |
| H | 3.30679100  | 3.81910200  | 1.29326600  |
| H | 3.92295700  | 3.62764500  | -0.36420500 |
| C | 1.42561900  | 3.36021300  | -1.57572000 |
| H | 2.23690800  | 3.13835100  | -2.27745100 |
| H | 0.53228500  | 2.81112600  | -1.88754600 |
| H | 1.19244200  | 4.42733400  | -1.64639600 |
| B | -1.60613000 | 0.62990000  | -0.91118500 |
| O | -2.29274900 | -0.45526500 | -1.48443300 |
| O | -2.40490500 | 1.24432600  | 0.06782300  |
| C | -3.63807700 | 0.52047200  | 0.18126100  |
| C | -4.31067300 | -1.68709700 | -1.03524600 |
| H | -5.36796900 | -1.60977000 | -0.75673700 |
| H | -4.25182600 | -2.20142600 | -2.00011600 |
| H | -3.79835200 | -2.30470500 | -0.29474300 |
| C | -4.33659800 | 0.45552300  | -2.31092300 |
| H | -4.17201900 | -0.09948300 | -3.23978200 |
| H | -5.41572100 | 0.57186000  | -2.16562800 |
| H | -3.89246600 | 1.44857300  | -2.43517200 |
| C | -4.76823300 | 1.53528700  | 0.33059400  |
| H | -5.74469000 | 1.03756800  | 0.33999000  |
| H | -4.65499700 | 2.07214900  | 1.27845000  |
| H | -4.75806200 | 2.27328300  | -0.47467400 |
| C | -3.59837200 | -0.36184300 | 1.43013500  |
| H | -3.42885300 | 0.26569800  | 2.31064800  |
| H | -4.54716000 | -0.89019300 | 1.57274200  |
| H | -2.78918900 | -1.09422400 | 1.37759700  |
| C | -3.67515700 | -0.30723200 | -1.15633000 |
| H | -0.92870200 | 1.34359000  | -1.60541700 |



A4

| -----                   |             |             |             |
|-------------------------|-------------|-------------|-------------|
| Coordinates (Angstroms) |             |             |             |
|                         | X           | Y           | Z           |
| -----                   |             |             |             |
| C                       | -0.44656600 | -2.78262500 | 0.44220200  |
| C                       | -0.12052600 | -1.49294900 | 0.63235200  |
| C                       | -0.90758100 | -3.31608600 | -0.88408800 |
| H                       | -1.94801200 | -3.66128900 | -0.83436400 |
| H                       | -0.86303500 | -2.56326900 | -1.67100600 |
| H                       | -0.29547800 | -4.18298200 | -1.17534200 |
| C                       | -0.33819900 | -3.79104800 | 1.55383900  |
| H                       | -1.29994700 | -4.29860500 | 1.71223700  |
| H                       | 0.38998200  | -4.57720500 | 1.30594000  |
| H                       | -0.03234700 | -3.33150500 | 2.49600900  |
| O                       | -0.20005200 | -0.52064200 | -0.29508600 |
| O                       | 0.51450400  | -1.11437500 | 1.78824600  |
| C                       | -0.09366200 | -0.06767300 | 2.52866500  |
| H                       | -0.80892300 | -0.48505200 | 3.24952800  |
| H                       | 0.70342000  | 0.44145900  | 3.07816100  |
| H                       | -0.61389700 | 0.63472100  | 1.87315200  |
| C                       | 2.63388000  | 1.53975600  | 1.17142500  |
| C                       | 3.19457900  | 0.32316600  | 1.01653900  |
| H                       | 2.73446300  | 2.20104600  | 2.01880700  |
| H                       | 3.84172300  | -0.18828500 | 1.71232100  |
| N                       | 1.86394300  | 1.89406100  | 0.07680300  |
| N                       | 2.84530100  | -0.25317800 | -0.18837000 |
| P                       | 1.74910600  | 0.66842300  | -1.05425000 |
| C                       | 3.42164600  | -1.55285900 | -0.64983500 |
| C                       | 1.22304500  | 3.24458900  | -0.02607100 |
| C                       | 3.26507800  | -2.60915800 | 0.44777900  |
| H                       | 2.21229800  | -2.74486900 | 0.70419300  |
| H                       | 3.66382200  | -3.56080400 | 0.08195000  |
| H                       | 3.81717200  | -2.35094600 | 1.35663200  |
| C                       | 2.67142100  | -2.00900200 | -1.90234100 |
| H                       | 3.07145600  | -2.97443000 | -2.22564600 |
| H                       | 1.60261200  | -2.13765900 | -1.70189800 |
| H                       | 2.79756300  | -1.30769400 | -2.73510500 |
| C                       | 4.90095400  | -1.31563600 | -0.97214000 |
| H                       | 5.45446600  | -0.98944000 | -0.08493200 |
| H                       | 5.35845900  | -2.24237100 | -1.33302900 |
| H                       | 5.01153300  | -0.55035400 | -1.74771000 |
| C                       | 0.12895900  | 3.36535300  | 1.03823100  |
| H                       | -0.28574400 | 4.37888500  | 1.01252500  |
| H                       | -0.68302400 | 2.65567600  | 0.84551700  |

|   |             |             |             |
|---|-------------|-------------|-------------|
| H | 0.52681800  | 3.19492700  | 2.04485800  |
| C | 2.31689900  | 4.30069200  | 0.17464300  |
| H | 1.88478000  | 5.29625800  | 0.03462000  |
| H | 2.74903600  | 4.26879800  | 1.17954500  |
| H | 3.12318900  | 4.16943800  | -0.55494600 |
| C | 0.60915900  | 3.41446700  | -1.41584600 |
| H | 1.36617300  | 3.34036600  | -2.20522600 |
| H | -0.18272800 | 2.68252900  | -1.60307600 |
| H | 0.15948000  | 4.40984800  | -1.47948700 |
| B | -1.47309200 | 0.16751000  | -0.83246200 |
| O | -2.48393800 | -0.79590400 | -1.20407800 |
| O | -2.09245800 | 1.03149800  | 0.17575200  |
| C | -3.41519000 | 0.57925200  | 0.42545300  |
| C | -4.74280000 | -1.37792600 | -0.67034200 |
| H | -5.70994600 | -0.99879300 | -0.31832400 |
| H | -4.90795200 | -1.89412400 | -1.62247500 |
| H | -4.37256200 | -2.11360400 | 0.04831900  |
| C | -4.21103100 | 0.65272700  | -2.02400400 |
| H | -4.21502500 | 0.06437700  | -2.94773300 |
| H | -5.22146000 | 1.04553800  | -1.86244700 |
| H | -3.52809300 | 1.49590500  | -2.16825700 |
| C | -4.31513300 | 1.79103200  | 0.65490200  |
| H | -5.36638100 | 1.49528900  | 0.75612100  |
| H | -4.02052300 | 2.30213000  | 1.57885500  |
| H | -4.23257100 | 2.51116200  | -0.16335300 |
| C | -3.42587500 | -0.29815600 | 1.68325100  |
| H | -3.02728900 | 0.27637800  | 2.52603500  |
| H | -4.43915700 | -0.62154700 | 1.94843500  |
| H | -2.79823900 | -1.18441600 | 1.54500200  |
| C | -3.74055200 | -0.24469500 | -0.86881600 |
| H | -1.00741600 | 0.82049800  | -1.77083400 |

### TSA3

| -----                   |             |             |             |
|-------------------------|-------------|-------------|-------------|
| Coordinates (Angstroms) |             |             |             |
|                         | X           | Y           | Z           |
| -----                   |             |             |             |
| C                       | -0.96406100 | -3.03746700 | 0.66163400  |
| C                       | -0.37675900 | -1.83877300 | 0.82010700  |
| C                       | -1.43314800 | -3.53389800 | -0.67693000 |
| H                       | -2.52555800 | -3.63605500 | -0.71363200 |
| H                       | -1.15117000 | -2.86008200 | -1.48630700 |
| H                       | -1.01205500 | -4.53140300 | -0.87632600 |
| C                       | -1.13995100 | -3.99206600 | 1.81169600  |
| H                       | -2.19354800 | -4.28833200 | 1.91697600  |

|   |             |             |             |
|---|-------------|-------------|-------------|
| H | -0.57300200 | -4.92117300 | 1.64990400  |
| H | -0.81105400 | -3.55844500 | 2.75853400  |
| O | -0.15257500 | -0.92476800 | -0.13096000 |
| O | 0.24341400  | -1.55378800 | 2.01955800  |
| C | -0.24552000 | -0.40742200 | 2.68956300  |
| H | -1.15430100 | -0.65355700 | 3.25624800  |
| H | 0.52755800  | -0.08938800 | 3.39639700  |
| H | -0.47547400 | 0.39724900  | 1.98652700  |
| C | 2.37928800  | 1.18627700  | 1.36710400  |
| C | 2.93191400  | -0.01074400 | 1.05015400  |
| H | 2.32705500  | 1.63617900  | 2.34643700  |
| H | 3.38457800  | -0.71601700 | 1.73022600  |
| N | 1.84949900  | 1.81253700  | 0.26862800  |
| N | 2.84278700  | -0.27000200 | -0.29173100 |
| P | 2.00883900  | 0.91086500  | -1.12983500 |
| C | 3.37375400  | -1.52962300 | -0.90325900 |
| C | 1.24189800  | 3.18456400  | 0.33822100  |
| C | 2.68295200  | -2.73121500 | -0.25504700 |
| H | 1.61079500  | -2.71373800 | -0.45813000 |
| H | 3.10693000  | -3.65127700 | -0.67008700 |
| H | 2.82396900  | -2.75485700 | 0.82924100  |
| C | 3.07275900  | -1.51970100 | -2.40245000 |
| H | 3.45336300  | -2.44619100 | -2.84191700 |
| H | 1.99463300  | -1.48256700 | -2.59546500 |
| H | 3.56305100  | -0.68545000 | -2.91773000 |
| C | 4.88751100  | -1.55906800 | -0.66972400 |
| H | 5.13296000  | -1.60958200 | 0.39595600  |
| H | 5.31373700  | -2.44515900 | -1.15001100 |
| H | 5.36653500  | -0.67093500 | -1.09502400 |
| C | 0.21217900  | 3.22515100  | 1.46960900  |
| H | -0.21861000 | 4.23081600  | 1.51437300  |
| H | -0.58900500 | 2.50883900  | 1.26362800  |
| H | 0.65676100  | 3.01930600  | 2.44867700  |
| C | 2.38219600  | 4.17832900  | 0.57844500  |
| H | 1.98061600  | 5.19589600  | 0.61097000  |
| H | 2.88834000  | 3.98666800  | 1.53082100  |
| H | 3.12499800  | 4.12573600  | -0.22484800 |
| C | 0.53333600  | 3.47872400  | -0.98468700 |
| H | 1.22758700  | 3.49288900  | -1.83339000 |
| H | -0.26420600 | 2.75101500  | -1.16688800 |
| H | 0.07812700  | 4.47157000  | -0.92316900 |
| B | -1.16101500 | -0.02955600 | -0.79385500 |
| O | -2.32482300 | -0.73812100 | -1.28880300 |
| O | -1.69664400 | 1.01251200  | 0.10744500  |

|   |             |             |             |
|---|-------------|-------------|-------------|
| C | -3.10693500 | 0.88484500  | 0.18048800  |
| C | -4.70399000 | -0.75712700 | -1.06159600 |
| H | -5.59249200 | -0.15066500 | -0.84685000 |
| H | -4.86260500 | -1.26091800 | -2.02151200 |
| H | -4.61144500 | -1.52801000 | -0.29207800 |
| C | -3.54122200 | 1.03515300  | -2.35459900 |
| H | -3.55282500 | 0.42399900  | -3.26332900 |
| H | -4.45007100 | 1.64823100  | -2.34158400 |
| H | -2.67302700 | 1.69950600  | -2.41142700 |
| C | -3.72960400 | 2.27606300  | 0.27489000  |
| H | -4.82413300 | 2.22788600  | 0.22112700  |
| H | -3.46287300 | 2.74153600  | 1.23099200  |
| H | -3.37058000 | 2.92940900  | -0.52507200 |
| C | -3.47415100 | 0.08374500  | 1.43575500  |
| H | -3.05834200 | 0.58752000  | 2.31530900  |
| H | -4.55871900 | 0.00551900  | 1.57477800  |
| H | -3.04955400 | -0.92401200 | 1.38776700  |
| C | -3.44555600 | 0.10310600  | -1.13569600 |
| H | -0.47677400 | 0.50530000  | -1.69158400 |

**TS2-3a**

| -----                   |            |             |             |
|-------------------------|------------|-------------|-------------|
| Coordinates (Angstroms) |            |             |             |
|                         | X          | Y           | Z           |
| -----                   |            |             |             |
| N                       | 0.56714400 | -1.12417500 | -0.90798400 |
| C                       | 1.71902700 | -1.28663400 | -1.07322300 |
| C                       | 2.88838800 | -1.86672100 | -1.73116000 |
| H                       | 3.49197800 | -1.07289200 | -2.17722700 |
| H                       | 3.49918700 | -2.40887200 | -1.00583900 |
| H                       | 2.55082300 | -2.55529200 | -2.51174100 |
| C                       | 2.88508900 | -0.10963700 | 0.70886400  |
| C                       | 2.66633700 | -1.22035200 | 1.70546300  |
| H                       | 3.17306700 | -0.98819000 | 2.65298700  |
| H                       | 1.60745000 | -1.37781900 | 1.92143900  |
| H                       | 3.09052600 | -2.17052300 | 1.35340200  |
| C                       | 4.31334300 | 0.20033300  | 0.34799900  |
| H                       | 4.83509800 | 0.68661000  | 1.18436600  |
| H                       | 4.86845000 | -0.71990200 | 0.12625500  |
| H                       | 4.38935800 | 0.86621600  | -0.51564900 |
| C                       | 1.88978000 | 0.80104400  | 0.46333800  |
| O                       | 0.64489700 | 0.59518100  | 0.79580600  |
| O                       | 2.18925200 | 1.93106700  | -0.20775000 |
| C                       | 1.11935800 | 2.83371800  | -0.48765900 |
| H                       | 0.33128300 | 2.35868400  | -1.07592800 |

|   |             |             |             |
|---|-------------|-------------|-------------|
| H | 0.68804000  | 3.22277200  | 0.43994600  |
| H | 1.57584400  | 3.65098300  | -1.04856500 |
| B | -0.37966500 | -0.18412300 | 0.00106100  |
| O | -1.20381000 | -0.92211400 | 0.88044800  |
| O | -1.19426400 | 0.59295200  | -0.87384000 |
| C | -2.51436400 | 0.57950800  | -0.32989200 |
| C | -3.49045900 | -0.86265000 | 1.60509500  |
| H | -4.52611000 | -0.67497200 | 1.29872000  |
| H | -3.44805100 | -1.85739100 | 2.06142800  |
| H | -3.21265600 | -0.13259400 | 2.36918400  |
| C | -2.83295300 | -1.96933300 | -0.53895900 |
| H | -2.62370100 | -2.90860100 | -0.01688500 |
| H | -3.87810300 | -1.98546100 | -0.86670000 |
| H | -2.19068800 | -1.92500700 | -1.42449100 |
| C | -3.52068000 | 0.71912200  | -1.46473200 |
| H | -4.54697600 | 0.62093400  | -1.09235800 |
| H | -3.42311300 | 1.70647500  | -1.92900900 |
| H | -3.35629800 | -0.03280100 | -2.24065700 |
| C | -2.64861200 | 1.76513900  | 0.63290700  |
| H | -2.41321700 | 2.68818800  | 0.09249100  |
| H | -3.66326800 | 1.85659400  | 1.03582400  |
| H | -1.94692600 | 1.67404300  | 1.46748900  |
| C | -2.54630100 | -0.80154200 | 0.41109000  |

3a

| -----                   |            |             |             |
|-------------------------|------------|-------------|-------------|
| Coordinates (Angstroms) |            |             |             |
|                         | X          | Y           | Z           |
| -----                   |            |             |             |
| N                       | 0.71379200 | -1.16834300 | -1.03034100 |
| C                       | 1.94150500 | -1.16200200 | -0.74003000 |
| C                       | 2.91149300 | -1.96867700 | -1.56238400 |
| H                       | 3.65532100 | -1.32027900 | -2.03844800 |
| H                       | 3.45881300 | -2.68077500 | -0.93344300 |
| H                       | 2.36702400 | -2.51601900 | -2.33377400 |
| C                       | 2.49445000 | -0.40070100 | 0.48796900  |
| C                       | 2.13361200 | -1.21044300 | 1.74131400  |
| H                       | 2.49482100 | -0.70419400 | 2.64138900  |
| H                       | 1.05238300 | -1.34041300 | 1.83053300  |
| H                       | 2.60078200 | -2.19994700 | 1.69154600  |
| C                       | 4.01303800 | -0.16051800 | 0.43381200  |
| H                       | 4.32459000 | 0.43280500  | 1.30042900  |
| H                       | 4.55713000 | -1.10878700 | 0.47352100  |
| H                       | 4.31188700 | 0.37802600  | -0.46913300 |
| C                       | 1.80271000 | 0.96046700  | 0.53725000  |

|   |             |             |             |
|---|-------------|-------------|-------------|
| O | 1.12074000  | 1.36732500  | 1.45020500  |
| O | 2.06137900  | 1.66670600  | -0.56741600 |
| C | 1.36214300  | 2.90515700  | -0.69993800 |
| H | 0.29582600  | 2.70842100  | -0.83144500 |
| H | 1.52197500  | 3.54042600  | 0.17427200  |
| H | 1.76950300  | 3.37903900  | -1.59318100 |
| B | -0.50991300 | -0.65788000 | -0.52714000 |
| O | -1.25070500 | -1.31358500 | 0.43098600  |
| O | -1.15553600 | 0.43721300  | -1.05878200 |
| C | -2.37392900 | 0.62250400  | -0.30498200 |
| C | -3.18839900 | -0.75833500 | 1.74985000  |
| H | -4.18084900 | -0.29465600 | 1.73723100  |
| H | -3.29711100 | -1.77885100 | 2.13056000  |
| H | -2.55172500 | -0.20506000 | 2.44381300  |
| C | -3.38656700 | -1.75156600 | -0.53688300 |
| H | -3.33583200 | -2.75558400 | -0.10463300 |
| H | -4.43936300 | -1.46121200 | -0.61058200 |
| H | -2.96639100 | -1.80164700 | -1.54679900 |
| C | -3.47394600 | 1.05162100  | -1.26669800 |
| H | -4.43375300 | 1.13561200  | -0.74487900 |
| H | -3.23274000 | 2.03236700  | -1.68874100 |
| H | -3.58687100 | 0.34861300  | -2.09510200 |
| C | -2.12224600 | 1.72572800  | 0.72198900  |
| H | -1.84544300 | 2.64689500  | 0.19947000  |
| H | -3.02225200 | 1.93357500  | 1.30961100  |
| H | -1.30350500 | 1.46714500  | 1.39790800  |
| C | -2.59190200 | -0.79139600 | 0.35006800  |

2a

| -----                   |             |             |             |
|-------------------------|-------------|-------------|-------------|
| Coordinates (Angstroms) |             |             |             |
|                         | X           | Y           | Z           |
| -----                   |             |             |             |
| C                       | -2.18863200 | 0.27725700  | -0.08157600 |
| O                       | -2.77951600 | 1.19807200  | 0.71749700  |
| O                       | -1.09459000 | 0.76570800  | -0.75261300 |
| C                       | -3.07082300 | 2.43918400  | 0.08606500  |
| H                       | -3.65588900 | 3.01740600  | 0.80361100  |
| H                       | -2.15708200 | 2.98725200  | -0.16450500 |
| H                       | -3.66128700 | 2.28505600  | -0.82581600 |
| C                       | -2.63908300 | -0.97266700 | -0.21121300 |
| C                       | -3.87271000 | -1.43953400 | 0.50877700  |
| H                       | -3.62675900 | -2.23540000 | 1.22459500  |
| H                       | -4.35671600 | -0.62866800 | 1.05662000  |
| H                       | -4.59858900 | -1.86187500 | -0.19883900 |

|   |             |             |             |
|---|-------------|-------------|-------------|
| C | -1.89158900 | -2.00375500 | -1.01163400 |
| H | -1.31226800 | -2.66965500 | -0.35830900 |
| H | -2.59249000 | -2.63279200 | -1.57383500 |
| H | -1.20160000 | -1.55616900 | -1.73248300 |
| C | 2.42123600  | 0.53417600  | -0.31320700 |
| C | 1.90081000  | -0.66230300 | 0.56243600  |
| C | 2.78987900  | 1.76497300  | 0.51525200  |
| H | 3.71456600  | 1.60733200  | 1.07935900  |
| H | 2.93935500  | 2.61412900  | -0.15847400 |
| H | 1.99287100  | 2.02735000  | 1.21875700  |
| C | 1.99162500  | -2.01060000 | -0.15286200 |
| H | 3.02867300  | -2.34748900 | -0.24721800 |
| H | 1.43958200  | -2.75829000 | 0.42441100  |
| H | 1.55045800  | -1.96199100 | -1.15377200 |
| C | 3.55296900  | 0.18106900  | -1.26595600 |
| H | 3.25044600  | -0.58719000 | -1.98101100 |
| H | 3.85155500  | 1.06945500  | -1.83126500 |
| H | 4.42760700  | -0.17831900 | -0.71307800 |
| C | 2.52059500  | -0.75901800 | 1.94773500  |
| H | 2.34165600  | 0.14529500  | 2.53346600  |
| H | 2.08463700  | -1.60476700 | 2.48834400  |
| H | 3.60126800  | -0.92286100 | 1.87535300  |
| O | 0.49464700  | -0.35310100 | 0.69940400  |
| O | 1.25189100  | 0.88037400  | -1.08936000 |
| B | 0.17497500  | 0.43421500  | -0.37364800 |

**TSB1**

| -----                   |             |            |             |
|-------------------------|-------------|------------|-------------|
| Coordinates (Angstroms) |             |            |             |
|                         | X           | Y          | Z           |
| -----                   |             |            |             |
| C                       | -0.30090900 | 1.87226300 | 1.34591200  |
| C                       | 1.03228600  | 1.64281100 | 1.41170500  |
| H                       | -0.92523000 | 2.29064200 | 2.12068600  |
| H                       | 1.67652600  | 1.82838200 | 2.25749000  |
| P                       | 0.29233600  | 0.78896100 | -0.87655100 |
| N                       | -0.82359500 | 1.53342100 | 0.11869500  |
| N                       | 1.51933200  | 1.13561500 | 0.23054600  |
| C                       | -2.26214400 | 1.79328700 | -0.22498800 |
| C                       | 2.92635600  | 0.65296300 | 0.07505100  |
| C                       | -2.48253500 | 1.50545200 | -1.70994900 |
| H                       | -2.26328900 | 0.45478700 | -1.92767500 |
| H                       | -3.53328700 | 1.69819600 | -1.94772000 |
| H                       | -1.87154000 | 2.16108400 | -2.34280600 |
| C                       | -3.12723300 | 0.85793500 | 0.61970000  |

|   |             |             |             |
|---|-------------|-------------|-------------|
| H | -2.88770000 | -0.17517200 | 0.35472600  |
| H | -2.95795100 | 1.00902300  | 1.69172800  |
| H | -4.18513700 | 1.05178900  | 0.41340100  |
| C | -2.56204000 | 3.26723100  | 0.06872600  |
| H | -2.49325900 | 3.50595600  | 1.13495800  |
| H | -1.88162900 | 3.92525800  | -0.48239900 |
| H | -3.58552800 | 3.48920700  | -0.24856300 |
| C | 3.24651300  | 0.53801200  | -1.41757900 |
| H | 2.63561300  | -0.22271000 | -1.91437500 |
| H | 3.10721600  | 1.49557100  | -1.93080200 |
| H | 4.29118100  | 0.23607400  | -1.53616200 |
| C | 3.05172600  | -0.71620000 | 0.75375100  |
| H | 2.36405900  | -1.44480600 | 0.31086600  |
| H | 4.07436900  | -1.09119600 | 0.64134500  |
| H | 2.83306900  | -0.64404400 | 1.82450800  |
| C | 3.87628600  | 1.67167100  | 0.71179600  |
| H | 3.72084600  | 2.67065300  | 0.29139800  |
| H | 3.76494000  | 1.72583400  | 1.79885400  |
| H | 4.90891200  | 1.37223200  | 0.50928100  |
| H | 0.13270800  | -1.10260500 | 0.05645100  |
| C | -0.65905700 | -1.91236600 | -0.26295900 |
| O | -1.51846000 | -1.42971400 | -1.09538700 |
| O | 0.23029500  | -2.96818900 | -0.76740200 |
| C | 0.60506000  | -2.75747800 | -2.09471400 |
| H | -0.26065000 | -2.68289700 | -2.76292600 |
| H | 1.19833900  | -1.83251900 | -2.22057600 |
| H | 1.23228800  | -3.60418100 | -2.39549800 |
| C | -1.16456700 | -2.49045200 | 1.06674100  |
| C | -2.46424400 | -2.72225200 | 1.23193700  |
| H | -3.15259700 | -2.50947700 | 0.41844500  |
| H | -2.86999500 | -3.13849300 | 2.15225700  |
| C | -0.12890700 | -2.75864400 | 2.12043500  |
| H | 0.61145300  | -3.47907200 | 1.75465800  |
| H | 0.41760700  | -1.83767900 | 2.36756300  |
| H | -0.57076500 | -3.14967700 | 3.04339500  |

**B1**

| -----                   |             |             |             |
|-------------------------|-------------|-------------|-------------|
| Coordinates (Angstroms) |             |             |             |
|                         | X           | Y           | Z           |
| -----                   |             |             |             |
| C                       | -0.13357700 | -1.12340900 | -1.52500500 |
| C                       | 1.09186700  | -0.58750500 | -1.58223100 |
| H                       | -0.73368500 | -1.43023400 | -2.37128200 |
| H                       | 1.64835900  | -0.37163800 | -2.48353600 |



|   |             |             |             |
|---|-------------|-------------|-------------|
| P | 0.38057800  | -0.40102500 | 0.90510700  |
| N | -0.65225200 | -1.18834200 | -0.22271400 |
| N | 1.58134100  | -0.18714100 | -0.32152000 |
| C | -1.71308200 | -2.16419000 | 0.11589800  |
| C | 3.02421700  | -0.34344400 | 0.00047600  |
| C | -2.07065700 | -2.04356700 | 1.59951100  |
| H | -2.38505800 | -1.02400600 | 1.84653800  |
| H | -2.90121300 | -2.71935600 | 1.82822800  |
| H | -1.23089000 | -2.31705900 | 2.24600800  |
| C | -2.96697600 | -1.85639700 | -0.71501000 |
| H | -3.31657400 | -0.84010900 | -0.51049300 |
| H | -2.78256300 | -1.95196300 | -1.79020400 |
| H | -3.76758900 | -2.55918200 | -0.45915200 |
| C | -1.21388000 | -3.58605100 | -0.17738700 |
| H | -0.98752900 | -3.71711100 | -1.24137000 |
| H | -0.30042700 | -3.79403200 | 0.39095800  |
| H | -1.97078700 | -4.32832600 | 0.09938900  |
| C | 3.36937400  | 0.52217700  | 1.21629400  |
| H | 3.18325500  | 1.57998500  | 1.00610200  |
| H | 2.78920300  | 0.23918100  | 2.10083000  |
| H | 4.42905100  | 0.40167700  | 1.46565200  |
| C | 3.86699100  | 0.13520100  | -1.18818600 |
| H | 3.56882800  | 1.14141500  | -1.50232000 |
| H | 4.92168000  | 0.16857200  | -0.89621700 |
| H | 3.79249300  | -0.53851400 | -2.04764600 |
| C | 3.34091300  | -1.81779900 | 0.29375700  |
| H | 2.81297900  | -2.15767300 | 1.19188100  |
| H | 3.03033700  | -2.45051100 | -0.54552500 |
| H | 4.41475600  | -1.96594100 | 0.45616900  |
| H | -0.32802600 | 1.51268000  | -0.94195000 |
| C | -0.78044100 | 1.88337100  | -0.00950200 |
| O | -0.27988200 | 1.12455100  | 1.07998500  |
| O | -0.44524600 | 3.22501500  | 0.16094800  |
| C | 0.94150000  | 3.47340700  | 0.08620100  |
| H | 1.46429600  | 3.06953600  | 0.96046600  |
| H | 1.38040300  | 3.04048500  | -0.82490800 |
| H | 1.06841600  | 4.55863700  | 0.06264100  |
| C | -2.29301700 | 1.82085400  | -0.10682400 |
| C | -3.04679800 | 1.59751800  | 0.96640900  |
| H | -2.59943600 | 1.42811100  | 1.94094700  |
| H | -4.13242700 | 1.58634200  | 0.90419600  |
| C | -2.84228200 | 2.07004200  | -1.48149200 |
| H | -2.48807100 | 3.03242500  | -1.87084300 |
| H | -2.49973600 | 1.29532300  | -2.18029700 |

|   |             |            |             |
|---|-------------|------------|-------------|
| H | -3.93622200 | 2.07727200 | -1.48615400 |
|---|-------------|------------|-------------|

---

**B2**

---

Coordinates (Angstroms)

|   | X           | Y           | Z           |
|---|-------------|-------------|-------------|
| C | -3.88956000 | 0.21988300  | 0.24920600  |
| C | -3.41259700 | 1.41969200  | 0.60237200  |
| H | -4.79335200 | -0.25112800 | 0.60849100  |
| H | -3.85505000 | 2.11263400  | 1.30335500  |
| P | -1.56604100 | 0.38808400  | -0.90660700 |
| N | -3.04942000 | -0.43462200 | -0.66729400 |
| N | -2.20222300 | 1.71817600  | -0.04046300 |
| C | -3.42565100 | -1.72985100 | -1.26806400 |
| C | -1.56100000 | 3.04258100  | 0.09499500  |
| C | -2.36517700 | -2.15970500 | -2.28600200 |
| H | -1.38543000 | -2.29283600 | -1.81449400 |
| H | -2.65627800 | -3.11957700 | -2.72479600 |
| H | -2.26537100 | -1.43200900 | -3.09776700 |
| C | -3.52114900 | -2.80061800 | -0.17038500 |
| H | -2.54567500 | -2.94804900 | 0.30557200  |
| H | -4.24546700 | -2.52110100 | 0.60226300  |
| H | -3.84163300 | -3.75788900 | -0.59695900 |
| C | -4.77543800 | -1.57861600 | -1.98368500 |
| H | -5.57627200 | -1.31366400 | -1.28530000 |
| H | -4.71708500 | -0.79510700 | -2.74641100 |
| H | -5.05717500 | -2.51864500 | -2.47065700 |
| C | -0.21377200 | 3.04373300  | -0.63460100 |
| H | 0.47683600  | 2.30100300  | -0.22187700 |
| H | -0.33166100 | 2.85028900  | -1.70573600 |
| H | 0.25320700  | 4.02822300  | -0.52425100 |
| C | -1.32124300 | 3.34480900  | 1.58137200  |
| H | -0.77953300 | 2.51748600  | 2.04741500  |
| H | -0.74352800 | 4.26908200  | 1.69299400  |
| H | -2.26345200 | 3.48036400  | 2.12371400  |
| C | -2.47538200 | 4.10730700  | -0.52611300 |
| H | -2.63586600 | 3.90229600  | -1.58994300 |
| H | -3.45349400 | 4.12893900  | -0.03328000 |
| H | -2.02843800 | 5.10303100  | -0.42685300 |
| H | -1.88151300 | -0.82859200 | 1.59933900  |
| C | -0.79469100 | -0.79320400 | 1.45806000  |
| O | -0.48044500 | -0.39828800 | 0.15010500  |
| O | -0.36278000 | 0.15363300  | 2.40648800  |
| C | 1.03241500  | 0.38212400  | 2.40499000  |

|   |             |             |             |
|---|-------------|-------------|-------------|
| H | 1.58835400  | -0.50582800 | 2.74058600  |
| H | 1.39261900  | 0.67790100  | 1.41401900  |
| H | 1.21678700  | 1.19448900  | 3.11262100  |
| C | -0.21932700 | -2.17186200 | 1.74656600  |
| C | 0.44858000  | -2.86649400 | 0.82714200  |
| H | 0.62950900  | -2.46269100 | -0.16365100 |
| H | 0.84312900  | -3.85649200 | 1.04448800  |
| C | -0.49174600 | -2.68144100 | 3.13476000  |
| H | -0.07934700 | -2.00366200 | 3.89081800  |
| H | -1.57190400 | -2.73836800 | 3.32282300  |
| H | -0.06567700 | -3.67726900 | 3.28704400  |
| B | 2.27755400  | 0.09116000  | -1.51634800 |
| O | 3.10102600  | -0.98714000 | -1.66592600 |
| O | 2.76559200  | 1.03747100  | -0.65585100 |
| C | 4.13715100  | 0.67817500  | -0.36230900 |
| C | 5.46122300  | -1.35447300 | -1.31193600 |
| H | 6.30114600  | -1.19741200 | -0.62622500 |
| H | 5.38598500  | -2.42751100 | -1.51425300 |
| H | 5.68015100  | -0.84856400 | -2.25499700 |
| C | 3.78183300  | -1.73606800 | 0.49941600  |
| H | 3.63524800  | -2.76322300 | 0.15184100  |
| H | 4.56627300  | -1.73945800 | 1.26293900  |
| H | 2.84560600  | -1.40349000 | 0.95589500  |
| C | 4.44537300  | 1.02991800  | 1.08578500  |
| H | 5.47716400  | 0.75794700  | 1.33431700  |
| H | 4.33465800  | 2.10869400  | 1.23297300  |
| H | 3.77701500  | 0.52359300  | 1.78500200  |
| C | 5.01385600  | 1.51419700  | -1.29569900 |
| H | 4.80476400  | 2.57476000  | -1.12599200 |
| H | 6.07833400  | 1.34035800  | -1.11040800 |
| H | 4.80279000  | 1.29457600  | -2.34729500 |
| C | 4.16361900  | -0.85766700 | -0.69060300 |
| H | 1.25691100  | 0.21506100  | -2.11235400 |

**TSB2**

| -----                   |             |             |             |
|-------------------------|-------------|-------------|-------------|
| Coordinates (Angstroms) |             |             |             |
|                         | X           | Y           | Z           |
| -----                   |             |             |             |
| C                       | -3.58610900 | -0.37676700 | 0.38642400  |
| C                       | -3.38308900 | 0.92809300  | 0.61520600  |
| H                       | -4.32007700 | -1.01848100 | 0.85083000  |
| H                       | -3.92161300 | 1.56156700  | 1.30336000  |
| P                       | -1.52990300 | 0.24838100  | -1.05234500 |
| N                       | -2.67547100 | -0.88600700 | -0.54870800 |

|   |             |             |             |
|---|-------------|-------------|-------------|
| N | -2.31847500 | 1.42909800  | -0.14028400 |
| C | -2.73758300 | -2.29466100 | -1.01433900 |
| C | -1.98603500 | 2.87911800  | -0.17464100 |
| C | -1.61134000 | -2.55146200 | -2.01920300 |
| H | -0.62467400 | -2.38277200 | -1.57509100 |
| H | -1.65576500 | -3.59577200 | -2.34359000 |
| H | -1.70709400 | -1.92253900 | -2.91056000 |
| C | -2.56316500 | -3.23241300 | 0.18633800  |
| H | -1.59382900 | -3.06746300 | 0.66816200  |
| H | -3.35111700 | -3.08920700 | 0.93382500  |
| H | -2.60885400 | -4.27530600 | -0.14535800 |
| C | -4.09336300 | -2.52589100 | -1.69270700 |
| H | -4.92426100 | -2.38527800 | -0.99332200 |
| H | -4.22800200 | -1.83052000 | -2.52782100 |
| H | -4.15267500 | -3.54848800 | -2.07997300 |
| C | -0.61582900 | 3.06988400  | -0.83110200 |
| H | 0.17478900  | 2.54762600  | -0.28400100 |
| H | -0.60413100 | 2.72244600  | -1.87013300 |
| H | -0.37377300 | 4.13746200  | -0.84402200 |
| C | -1.92781800 | 3.42410100  | 1.25768200  |
| H | -1.26488000 | 2.80259700  | 1.86532400  |
| H | -1.54552300 | 4.45012500  | 1.24156200  |
| H | -2.91559600 | 3.45590000  | 1.72979400  |
| C | -3.06725700 | 3.60194900  | -0.98581300 |
| H | -3.09613300 | 3.22338700  | -2.01338600 |
| H | -4.05783400 | 3.45648400  | -0.54035200 |
| H | -2.86581100 | 4.67820800  | -1.01886000 |
| H | -1.32732200 | -0.49715500 | 1.50235900  |
| C | -0.24412000 | -0.35351200 | 1.42906500  |
| O | 0.03967100  | -0.24031000 | 0.03932600  |
| O | -0.05264400 | 0.83907500  | 2.13647800  |
| C | 1.28230600  | 1.24392100  | 2.38048400  |
| H | 1.82206500  | 0.51500000  | 3.00098100  |
| H | 1.81763900  | 1.40293400  | 1.44205100  |
| H | 1.21535400  | 2.18442800  | 2.93426000  |
| C | 0.35402200  | -1.56335200 | 2.12697900  |
| C | 0.98300900  | -2.55062300 | 1.49445700  |
| H | 1.23713500  | -2.48816200 | 0.44287800  |
| H | 1.30531100  | -3.43617300 | 2.03888400  |
| C | 0.00222500  | -1.63289500 | 3.59169500  |
| H | 0.44056400  | -0.80413500 | 4.15798300  |
| H | -1.08427400 | -1.56597000 | 3.73495700  |
| H | 0.34763800  | -2.57194200 | 4.03349500  |
| B | 1.45691600  | -0.10224800 | -0.99087500 |

|   |            |             |             |
|---|------------|-------------|-------------|
| O | 2.34453600 | -1.21105600 | -0.91783200 |
| O | 2.17589500 | 1.06866400  | -0.59532700 |
| C | 3.55778500 | 0.78977000  | -0.80072900 |
| C | 4.67540600 | -1.48786200 | -1.38889600 |
| H | 5.68646800 | -1.10877600 | -1.19830800 |
| H | 4.66472600 | -2.55635900 | -1.14785000 |
| H | 4.45919700 | -1.38486700 | -2.45486400 |
| C | 3.89435900 | -1.09691500 | 0.93722200  |
| H | 3.77086500 | -2.17427400 | 1.08580100  |
| H | 4.91169700 | -0.82666800 | 1.24210600  |
| H | 3.18330100 | -0.59144900 | 1.59289300  |
| C | 4.39180300 | 1.64939900  | 0.14311800  |
| H | 5.46104000 | 1.44581500  | 0.01421300  |
| H | 4.22066200 | 2.70850400  | -0.07712500 |
| H | 4.13487300 | 1.47871500  | 1.19173300  |
| C | 3.89815400 | 1.16057800  | -2.25069900 |
| H | 3.64111300 | 2.21215000  | -2.41379000 |
| H | 4.96273900 | 1.02881800  | -2.47197000 |
| H | 3.31701900 | 0.56134100  | -2.95858700 |
| C | 3.64186600 | -0.75791200 | -0.53353100 |
| H | 0.81959500 | -0.05415100 | -2.01920300 |

**B3**

| -----                   |             |             |             |
|-------------------------|-------------|-------------|-------------|
| Coordinates (Angstroms) |             |             |             |
|                         | X           | Y           | Z           |
| -----                   |             |             |             |
| C                       | -3.59000000 | -0.06111500 | 0.49236800  |
| C                       | -3.22322000 | 1.18781800  | 0.82781800  |
| H                       | -4.35309200 | -0.66724800 | 0.95720000  |
| H                       | -3.62656200 | 1.79511600  | 1.62378100  |
| P                       | -1.63323300 | 0.51592100  | -1.07172300 |
| N                       | -2.82626900 | -0.55195400 | -0.56372500 |
| N                       | -2.19681100 | 1.65987100  | 0.01616700  |
| C                       | -3.05481800 | -1.90356200 | -1.15132300 |
| C                       | -1.63601300 | 3.03445700  | 0.17580400  |
| C                       | -2.00298300 | -2.16390900 | -2.23277000 |
| H                       | -0.98738400 | -2.10870400 | -1.82558300 |
| H                       | -2.14729500 | -3.17089300 | -2.63548100 |
| H                       | -2.09022900 | -1.45924600 | -3.06691200 |
| C                       | -2.92030600 | -2.96649300 | -0.05504600 |
| H                       | -1.90520800 | -2.97971900 | 0.35326600  |
| H                       | -3.63050700 | -2.80680200 | 0.76278200  |
| H                       | -3.12441900 | -3.95417000 | -0.48115900 |
| C                       | -4.45817000 | -1.92791800 | -1.76597100 |

|   |             |             |             |
|---|-------------|-------------|-------------|
| H | -5.23490200 | -1.77865300 | -1.00830100 |
| H | -4.56042000 | -1.14384000 | -2.52336400 |
| H | -4.63927000 | -2.89625100 | -2.24350400 |
| C | -0.49388400 | 3.23946500  | -0.82246800 |
| H | 0.35532900  | 2.57612600  | -0.62313900 |
| H | -0.82440100 | 3.10142300  | -1.85831200 |
| H | -0.13292000 | 4.26869100  | -0.72998700 |
| C | -1.09613100 | 3.18556600  | 1.60094100  |
| H | -0.38476700 | 2.38552600  | 1.82154300  |
| H | -0.59507400 | 4.15370200  | 1.70238300  |
| H | -1.89846800 | 3.14849400  | 2.34617400  |
| C | -2.75693400 | 4.04181600  | -0.10167100 |
| H | -3.15420300 | 3.91367200  | -1.11425200 |
| H | -3.58355500 | 3.93618000  | 0.60899300  |
| H | -2.36784700 | 5.06086300  | -0.00819200 |
| H | -1.26763500 | -0.86444700 | 1.31505100  |
| C | -0.17361000 | -0.79604900 | 1.27998200  |
| O | 0.10888500  | -0.35042400 | -0.02607200 |
| O | 0.08848300  | 0.13671200  | 2.29486700  |
| C | 1.42935800  | 0.28308900  | 2.72922200  |
| H | 1.88247500  | -0.68531600 | 2.98076900  |
| H | 2.02703700  | 0.78156100  | 1.96382500  |
| H | 1.38832900  | 0.89125000  | 3.63778600  |
| C | 0.30885300  | -2.19511300 | 1.63521400  |
| C | 0.97376600  | -2.98995800 | 0.79992400  |
| H | 1.32922600  | -2.63608700 | -0.16238800 |
| H | 1.21562500  | -4.01140500 | 1.08897800  |
| C | -0.18299200 | -2.66178700 | 2.98225900  |
| H | 0.24635600  | -2.07332300 | 3.80078100  |
| H | -1.27292600 | -2.54865300 | 3.05865700  |
| H | 0.06241900  | -3.71448700 | 3.15008600  |
| B | 1.38324700  | 0.04967400  | -0.84256500 |
| O | 2.28342100  | -1.04263600 | -1.16647900 |
| O | 2.18331900  | 1.02928200  | -0.12283800 |
| C | 3.51918000  | 0.85491500  | -0.56244200 |
| C | 4.56237400  | -1.12182000 | -1.90101000 |
| H | 5.58967100  | -0.79956700 | -1.69131000 |
| H | 4.56516100  | -2.21386700 | -1.99155900 |
| H | 4.25586500  | -0.71082900 | -2.86601700 |
| C | 3.97895300  | -1.46162500 | 0.49269400  |
| H | 3.85058200  | -2.53540600 | 0.32000900  |
| H | 5.02143000  | -1.28672500 | 0.78340900  |
| H | 3.32820700  | -1.18142000 | 1.32419200  |
| C | 4.47289300  | 1.39997600  | 0.49688600  |

|   |            |             |             |
|---|------------|-------------|-------------|
| H | 5.51820500 | 1.23454100  | 0.21077600  |
| H | 4.32005700 | 2.47883800  | 0.61126700  |
| H | 4.30737000 | 0.93333600  | 1.47166600  |
| C | 3.71270900 | 1.64943300  | -1.86311700 |
| H | 3.45492600 | 2.69716700  | -1.67433900 |
| H | 4.74665600 | 1.61076500  | -2.22367900 |
| H | 3.05320100 | 1.28069300  | -2.65419300 |
| C | 3.60576100 | -0.70068600 | -0.78559500 |
| H | 0.84517200 | 0.49404900  | -1.85614900 |

### TSB3

| -----                   |             |             |             |
|-------------------------|-------------|-------------|-------------|
| Coordinates (Angstroms) |             |             |             |
|                         | X           | Y           | Z           |
| -----                   |             |             |             |
| C                       | -3.26979000 | -0.02161500 | 0.79441200  |
| C                       | -2.67918200 | 1.08689300  | 1.30073400  |
| H                       | -3.91212200 | -0.71311900 | 1.31929900  |
| H                       | -2.75609700 | 1.46118200  | 2.31012700  |
| P                       | -1.85330400 | 0.91919600  | -1.09564400 |
| N                       | -2.93819500 | -0.21630700 | -0.52701400 |
| N                       | -1.90916800 | 1.72970000  | 0.36027900  |
| C                       | -3.39537200 | -1.40135400 | -1.31693100 |
| C                       | -1.15856100 | 2.99230000  | 0.65625000  |
| C                       | -2.87857000 | -1.27085800 | -2.75156600 |
| H                       | -1.78322900 | -1.25633900 | -2.79139000 |
| H                       | -3.21292300 | -2.14032400 | -3.32490700 |
| H                       | -3.26978200 | -0.37590300 | -3.24841600 |
| C                       | -2.81735500 | -2.67099400 | -0.68477800 |
| H                       | -1.72401200 | -2.63978200 | -0.69609200 |
| H                       | -3.15853900 | -2.80203400 | 0.34751900  |
| H                       | -3.14828800 | -3.54397100 | -1.25643000 |
| C                       | -4.92635800 | -1.41893900 | -1.31330700 |
| H                       | -5.33399900 | -1.55658900 | -0.30658200 |
| H                       | -5.32864300 | -0.48753500 | -1.72523900 |
| H                       | -5.28229100 | -2.25046000 | -1.92929500 |
| C                       | -0.39178800 | 3.41481500  | -0.59821500 |
| H                       | 0.34625500  | 2.65538200  | -0.88069500 |
| H                       | -1.06130900 | 3.62402300  | -1.44122000 |
| H                       | 0.15477100  | 4.33698600  | -0.37810200 |
| C                       | -0.15858900 | 2.72134800  | 1.78200800  |
| H                       | 0.57784000  | 1.98607300  | 1.45062600  |
| H                       | 0.35690000  | 3.65617700  | 2.02755000  |
| H                       | -0.64872300 | 2.35678400  | 2.68952200  |
| C                       | -2.18190100 | 4.06317500  | 1.04385600  |

|   |             |             |             |
|---|-------------|-------------|-------------|
| H | -2.92268000 | 4.20219800  | 0.24893800  |
| H | -2.71026000 | 3.80921700  | 1.96900900  |
| H | -1.66912000 | 5.01610600  | 1.20650400  |
| H | -1.19891700 | -1.54997700 | 1.25532000  |
| C | -0.11740500 | -1.37084200 | 1.17910000  |
| O | 0.05719400  | -0.78501900 | -0.06258100 |
| O | 0.08968300  | -0.51810300 | 2.29324300  |
| C | 1.42507100  | -0.30291900 | 2.70020200  |
| H | 1.94790000  | -1.24709700 | 2.90882400  |
| H | 1.97974700  | 0.25882500  | 1.94494200  |
| H | 1.37561500  | 0.27345000  | 3.62983500  |
| C | 0.51765800  | -2.74058500 | 1.39897300  |
| C | 1.26160600  | -3.36230400 | 0.48704600  |
| H | 1.54604800  | -2.87188500 | -0.43847100 |
| H | 1.63399800  | -4.36954900 | 0.66915500  |
| C | 0.11246500  | -3.39347300 | 2.69682800  |
| H | 0.43310800  | -2.80856000 | 3.56636200  |
| H | -0.98096700 | -3.47722100 | 2.76761900  |
| H | 0.53421800  | -4.39937000 | 2.78532300  |
| B | 1.17585800  | -0.17815700 | -0.84750200 |
| O | 2.23194500  | -1.07780900 | -1.31757600 |
| O | 1.88631600  | 0.88274900  | -0.11340800 |
| C | 3.19281000  | 0.95281800  | -0.64872500 |
| C | 4.43398500  | -0.73135700 | -2.19772100 |
| H | 5.40625100  | -0.25157300 | -2.02953000 |
| H | 4.61215700  | -1.79874300 | -2.37002200 |
| H | 3.99254700  | -0.31759700 | -3.10805700 |
| C | 4.08448300  | -1.32699800 | 0.19202600  |
| H | 4.10309700  | -2.39385300 | -0.05544700 |
| H | 5.10920400  | -1.01606500 | 0.42855200  |
| H | 3.46582800  | -1.20839100 | 1.08461700  |
| C | 4.13032300  | 1.56973200  | 0.38655100  |
| H | 5.16530300  | 1.58456200  | 0.02409000  |
| H | 3.83003900  | 2.60439400  | 0.58863800  |
| H | 4.10659000  | 1.02374300  | 1.33341900  |
| C | 3.17057800  | 1.85494600  | -1.89358600 |
| H | 2.78397100  | 2.83945600  | -1.60585100 |
| H | 4.16781200  | 1.99653200  | -2.32521100 |
| H | 2.50994200  | 1.44804500  | -2.66472500 |
| C | 3.50256200  | -0.55091900 | -0.99764800 |
| H | 0.55344700  | 0.28011900  | -1.83124500 |

4a



| -----                   |             |             |             |
|-------------------------|-------------|-------------|-------------|
| Coordinates (Angstroms) |             |             |             |
|                         | X           | Y           | Z           |
| -----                   |             |             |             |
| B                       | -0.26395900 | -0.49960800 | 0.03527800  |
| O                       | -1.25699100 | -1.41834700 | -0.17435200 |
| O                       | -0.71854200 | 0.77266500  | 0.27717900  |
| C                       | -2.14883400 | 0.66544500  | 0.45421900  |
| C                       | -3.62485900 | -1.47390800 | 0.27945500  |
| H                       | -4.55727900 | -0.89897200 | 0.26031900  |
| H                       | -3.77698800 | -2.38466400 | -0.30811100 |
| H                       | -3.41756300 | -1.77043900 | 1.31010500  |
| C                       | -2.70587800 | -0.45074000 | -1.81052800 |
| H                       | -2.73034800 | -1.42456900 | -2.30839600 |
| H                       | -3.65427000 | 0.05923300  | -2.00637500 |
| H                       | -1.89506200 | 0.13496200  | -2.25596400 |
| C                       | -2.80789300 | 1.91232700  | -0.11560500 |
| H                       | -3.89915300 | 1.82566200  | -0.07180700 |
| H                       | -2.51444300 | 2.78784000  | 0.47238100  |
| H                       | -2.51255700 | 2.08801400  | -1.15242400 |
| C                       | -2.40795900 | 0.57278600  | 1.95804800  |
| H                       | -1.96911000 | 1.44680900  | 2.44891300  |
| H                       | -3.47951800 | 0.55609200  | 2.18101500  |
| H                       | -1.94958700 | -0.32309900 | 2.38958700  |
| C                       | -2.48117300 | -0.66517100 | -0.31357900 |
| O                       | 1.04772400  | -0.86975500 | 0.03410900  |
| C                       | 2.02495100  | 0.12269300  | 0.16731700  |
| H                       | 1.75787900  | 0.81794300  | 0.97855800  |
| C                       | 3.35758100  | -0.53450700 | 0.44752700  |
| C                       | 4.10419600  | -0.10699400 | 1.46454200  |
| H                       | 3.75928300  | 0.67591200  | 2.13677600  |
| H                       | 5.08461000  | -0.52983400 | 1.67054600  |
| O                       | 2.05794700  | 0.82228800  | -1.05451700 |
| C                       | 2.60792600  | 2.11387900  | -0.93911900 |
| H                       | 3.64383000  | 2.09084500  | -0.57209000 |
| H                       | 2.59801400  | 2.55267400  | -1.93918200 |
| H                       | 2.00657200  | 2.74494300  | -0.26773200 |
| C                       | 3.77601900  | -1.61212800 | -0.51045400 |
| H                       | 3.08959100  | -2.46379200 | -0.45489500 |
| H                       | 3.74112500  | -1.24001400 | -1.54033000 |
| H                       | 4.78920300  | -1.96439500 | -0.29757100 |
| -----                   |             |             |             |

**TS1-4a**

| -----                   |   |   |   |
|-------------------------|---|---|---|
| Coordinates (Angstroms) |   |   |   |
|                         | X | Y | Z |
| -----                   |   |   |   |

|   |             |             |             |
|---|-------------|-------------|-------------|
| H | 0.89875000  | 0.21105800  | 0.95226400  |
| C | 2.06295000  | 0.21027900  | -0.27187300 |
| O | 1.10653600  | 0.16528800  | -1.16072400 |
| B | 0.04746500  | 0.09286800  | -0.05351900 |
| O | -0.87216700 | 1.17337900  | -0.12571000 |
| O | -0.64419400 | -1.13944600 | 0.05300900  |
| C | -2.12386900 | 0.65453100  | 0.32724600  |
| C | -2.03519500 | -0.84934100 | -0.11105300 |
| C | -2.19633800 | 0.82046300  | 1.84907900  |
| H | -2.02945700 | 1.87382600  | 2.09687100  |
| H | -3.17249600 | 0.52505100  | 2.24823300  |
| H | -1.42367100 | 0.22889900  | 2.35108500  |
| C | -2.84658500 | -1.80901100 | 0.75031600  |
| H | -3.91287400 | -1.55586900 | 0.72383100  |
| H | -2.73422500 | -2.83112800 | 0.37338200  |
| H | -2.50925500 | -1.79593500 | 1.78976200  |
| C | -2.38910700 | -1.04992400 | -1.58825600 |
| H | -2.10588700 | -2.06519800 | -1.88430900 |
| H | -3.46153100 | -0.92535300 | -1.77458200 |
| H | -1.83923000 | -0.34765600 | -2.22252000 |
| C | -3.24784100 | 1.44287000  | -0.33305900 |
| H | -4.22373300 | 0.99854200  | -0.10659500 |
| H | -3.25085300 | 2.47249000  | 0.04071000  |
| H | -3.12277000 | 1.47957500  | -1.41799500 |
| O | 2.70378400  | 1.33402000  | -0.04240600 |
| C | 2.05011600  | 2.55880600  | -0.41675300 |
| H | 1.11661100  | 2.65858200  | 0.14239800  |
| H | 2.75117700  | 3.34773900  | -0.14871000 |
| H | 1.84287800  | 2.56880500  | -1.48735000 |
| C | 2.83896300  | -0.99690400 | 0.11697600  |
| C | 2.52800700  | -2.14308200 | -0.48996400 |
| H | 1.72608000  | -2.19268700 | -1.21839800 |
| H | 3.06417100  | -3.05982800 | -0.26207700 |
| C | 3.90344100  | -0.83204300 | 1.16223100  |
| H | 4.68578400  | -0.14187700 | 0.83060600  |
| H | 3.47943000  | -0.42327700 | 2.08668100  |
| H | 4.36484900  | -1.79589100 | 1.39161000  |

-----  
**TS1-2a**  
-----

Coordinates (Angstroms)

|   | X           | Y          | Z           |
|---|-------------|------------|-------------|
| C | -0.24189600 | 2.70969100 | -0.12096400 |
| O | -0.09722100 | 3.70175200 | 0.74083900  |

|   |             |             |             |
|---|-------------|-------------|-------------|
| O | -1.20854100 | 1.88808700  | 0.13781800  |
| C | -0.89415000 | 3.68796200  | 1.93067900  |
| H | -0.79184300 | 2.73448700  | 2.45309100  |
| H | -0.50325100 | 4.50132100  | 2.54163000  |
| H | -1.94538400 | 3.86690600  | 1.69436000  |
| C | 0.63099200  | 2.70456700  | -1.21484500 |
| C | 1.83995600  | 3.60552800  | -1.18558300 |
| H | 2.37950000  | 3.53882400  | -2.13503500 |
| H | 1.57026100  | 4.65502500  | -1.02822300 |
| H | 2.53344600  | 3.31505700  | -0.38814300 |
| C | 0.44749500  | 1.76752200  | -2.23707000 |
| B | -1.26980700 | 0.41582000  | -0.08675700 |
| O | -1.59410600 | -0.32649100 | 1.06037200  |
| O | -2.08192100 | 0.05447300  | -1.17245600 |
| C | -2.70647600 | -1.19046500 | -0.82587400 |
| C | -3.97546700 | -0.34810800 | 1.26329000  |
| H | -4.90200800 | -0.91640700 | 1.12877500  |
| H | -3.84274600 | -0.15721100 | 2.33298700  |
| H | -4.08285600 | 0.61806800  | 0.75989600  |
| C | -2.64291500 | -2.45605900 | 1.44748900  |
| H | -3.46816700 | -3.11811500 | 1.16137700  |
| H | -1.69887400 | -2.95326900 | 1.21167900  |
| H | -2.68671500 | -2.31106500 | 2.53203300  |
| C | -1.82648800 | -2.33124100 | -1.34014600 |
| H | -2.29793600 | -3.30652100 | -1.17719600 |
| H | -1.67682700 | -2.20143200 | -2.41715300 |
| H | -0.84016700 | -2.32869400 | -0.86870200 |
| C | -4.07238400 | -1.24892400 | -1.49734700 |
| H | -3.94703800 | -1.30227700 | -2.58376900 |
| H | -4.62475000 | -2.13970300 | -1.17757700 |
| H | -4.67189500 | -0.36400500 | -1.27072800 |
| C | -2.75353500 | -1.11038500 | 0.74358500  |
| H | 0.03255900  | 0.11285600  | -0.34164300 |
| H | 1.02709600  | 1.89465600  | -3.14969200 |
| H | -0.52083800 | 1.29201600  | -2.37724900 |
| B | 1.25679000  | -0.19639600 | -0.81926500 |
| O | 2.24965800  | 0.38644900  | -0.02535700 |
| O | 1.38085500  | -1.58550500 | -0.88307200 |
| C | 2.56559600  | -1.92860000 | -0.13981500 |
| C | 1.88329900  | -0.74860400 | 2.05546300  |
| H | 2.25158400  | -1.49977400 | 2.76236000  |
| H | 1.91208800  | 0.22768800  | 2.55042200  |
| H | 0.83707600  | -0.97098000 | 1.81976000  |
| C | 4.19419400  | -0.37442000 | 1.16525100  |

|   |            |             |             |
|---|------------|-------------|-------------|
| H | 4.23067200 | 0.50812400  | 1.81246300  |
| H | 4.64398400 | -1.21214300 | 1.70999000  |
| H | 4.79950800 | -0.16717400 | 0.27945600  |
| C | 3.70614500 | -2.09194700 | -1.14613100 |
| H | 4.62755400 | -2.43709200 | -0.66527800 |
| H | 3.41269700 | -2.83222000 | -1.89682800 |
| H | 3.91300300 | -1.14917500 | -1.66255700 |
| C | 2.31650600 | -3.24061000 | 0.59053300  |
| H | 1.41082000 | -3.19215200 | 1.19991500  |
| H | 2.19265300 | -4.05116600 | -0.13502600 |
| H | 3.16255200 | -3.49322800 | 1.23983300  |
| C | 2.75079800 | -0.68208900 | 0.79454300  |
| H | 1.10950300 | 0.44864000  | -1.94862100 |

---
